# Supplementary material for: Blockade of AIM2 inflammasome or α1-AR ameliorates IL-1β release and macrophage-mediated immunosuppression induced by CAR-T treatment
Source: PubMed Central journal article supplement — J Immunother Cancer. 2021 Jan 7;9(1):e001466. doi: 10.1136/jitc-2020-001466 (PMC7797290; doi:10.1136/jitc-2020-001466), 2021-01-07
Supplement: jitc-2020-001466supp008.pdf [file jitc-2020-001466supp008.pdf]

## SUPPLEMENTARY FIGURE LEGENDS

**Supplementary Figure 1.** The macrophages and CD19 CAR-T cells derived from the PBMCs of the seven patients with diffuse large B cell lymphoma (A, Donor 1 - 4) or B-cell acute lymphoblastic leukemia (B, Donor 5 - 7) were used in the coculture. The levels of AIM2 in the macrophages and cleaved IL-1 $\beta$  in the supernatant were determined by Western blot.

**Supplementary Figure 2.** The levels of cleaved IL-1 $\beta$  in supernatants and the inflammasomes in the CAR-T cells and Raji cells cultured alone were detected by Western blot. \* M-THP-1 cells cocultured with both CAR-T and Raji cells.

**Supplementary Figure 3.** The expression of Her2, BCMA and CD19 in Raji cells was analyzed by flow cytometry (A). The expression of Her2, BCMA and CD19 CAR in the infected T cells was evaluated by APC-Protein L staining and flow cytometry (B). BCMA CAR-T, Her2 CAR-T and CD19 CAR-T cells were cocultured with both Raji cells and the macrophages derived from THP-1 cells. The expression of AIM2 in the macrophages and the level of cleaved IL-1 $\beta$  in the cultural supernatants were analyzed by Western blot (C).

**Supplementary Figure 4.** Flow cytometry and proliferation assay (CCK8) were employed to evaluate the effects of thalidomide (1  $\mu$ M or 10  $\mu$ M for 24 h) treatment on the apoptosis (A) and cell viability (B) of CAR-T cells, Raji cells or M-THP-1 cells.

**Supplementary Figure 5.** The concentration of IL-1 $\beta$  in supernatants of the coculture of CAR-T/Raji/M-THP-1 in presence of prazosin or thalidomide was examined by ELISA (\*\*  $P < 0.01$ , \*\*\*  $P < 0.001$ ).

**Supplementary Figure 6.** CAR-T cells, Raji cells and macrophages derived from PBMCs are cocultured for 24 h, and then the Raji/Luc cells were added into the

coculture system for 48 h. The luciferase activity was measured to exhibit the cytotoxicity of CAR-T cells (\*\*  $P<0.01$ , \*\*\*  $P<0.001$ ).
