# Supplementary figures and images for: Blockade of AIM2 inflammasome or α1-AR ameliorates IL-1β release and macrophage-mediated immunosuppression induced by CAR-T treatment
Source: PubMed Central journal article supplement — J Immunother Cancer. 2021 Jan 7;9(1):e001466. doi: 10.1136/jitc-2020-001466 (PMC7797290; doi:10.1136/jitc-2020-001466), 2021-01-07

## Supplementary Figure 1

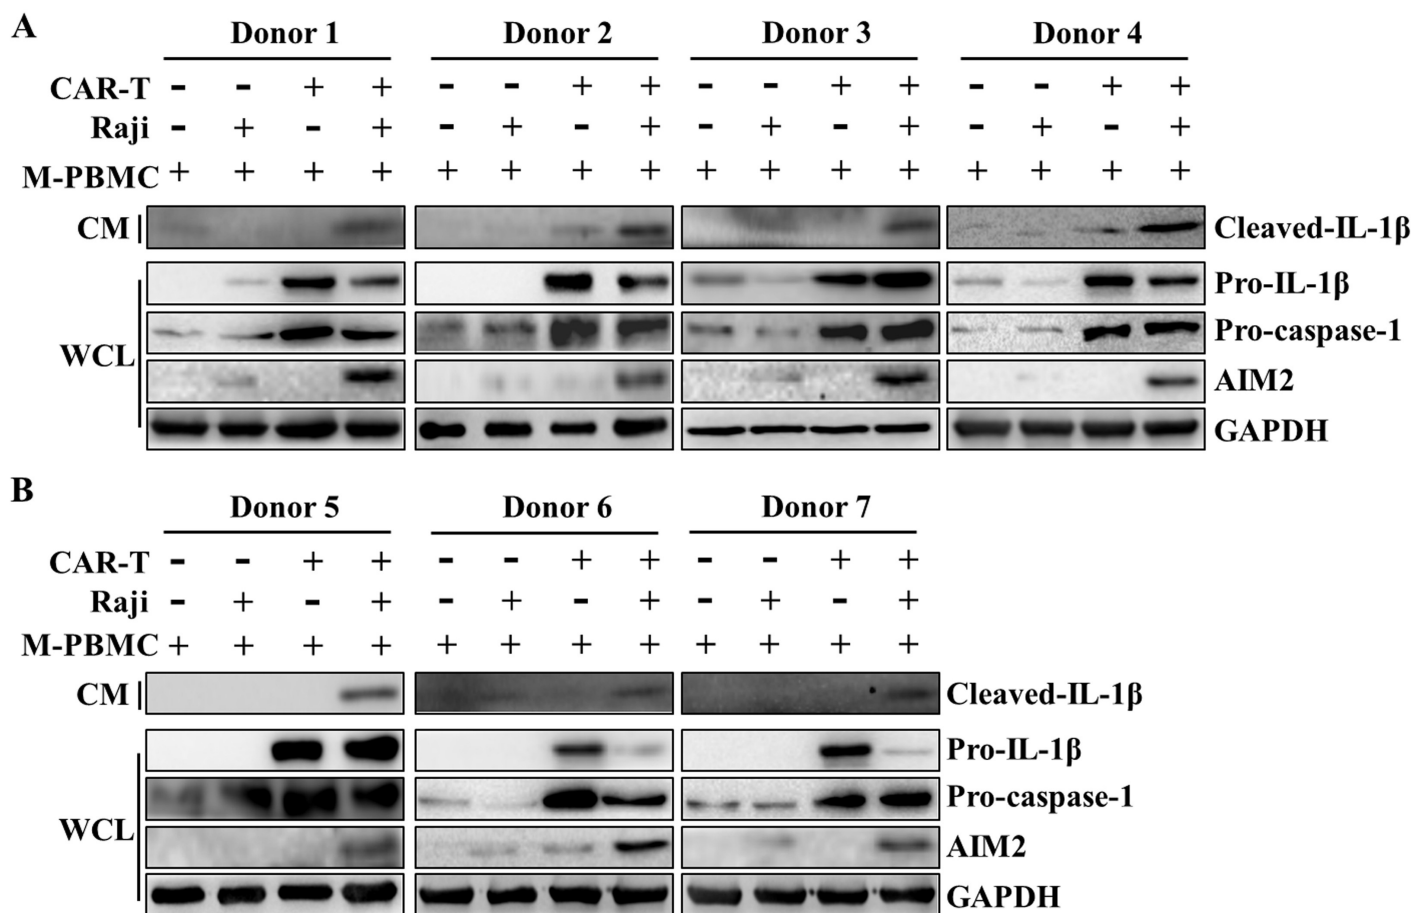

Supplement: jitc-2020-001466supp002.pdf [file jitc-2020-001466supp002.pdf]

## Supplementary Figure 2

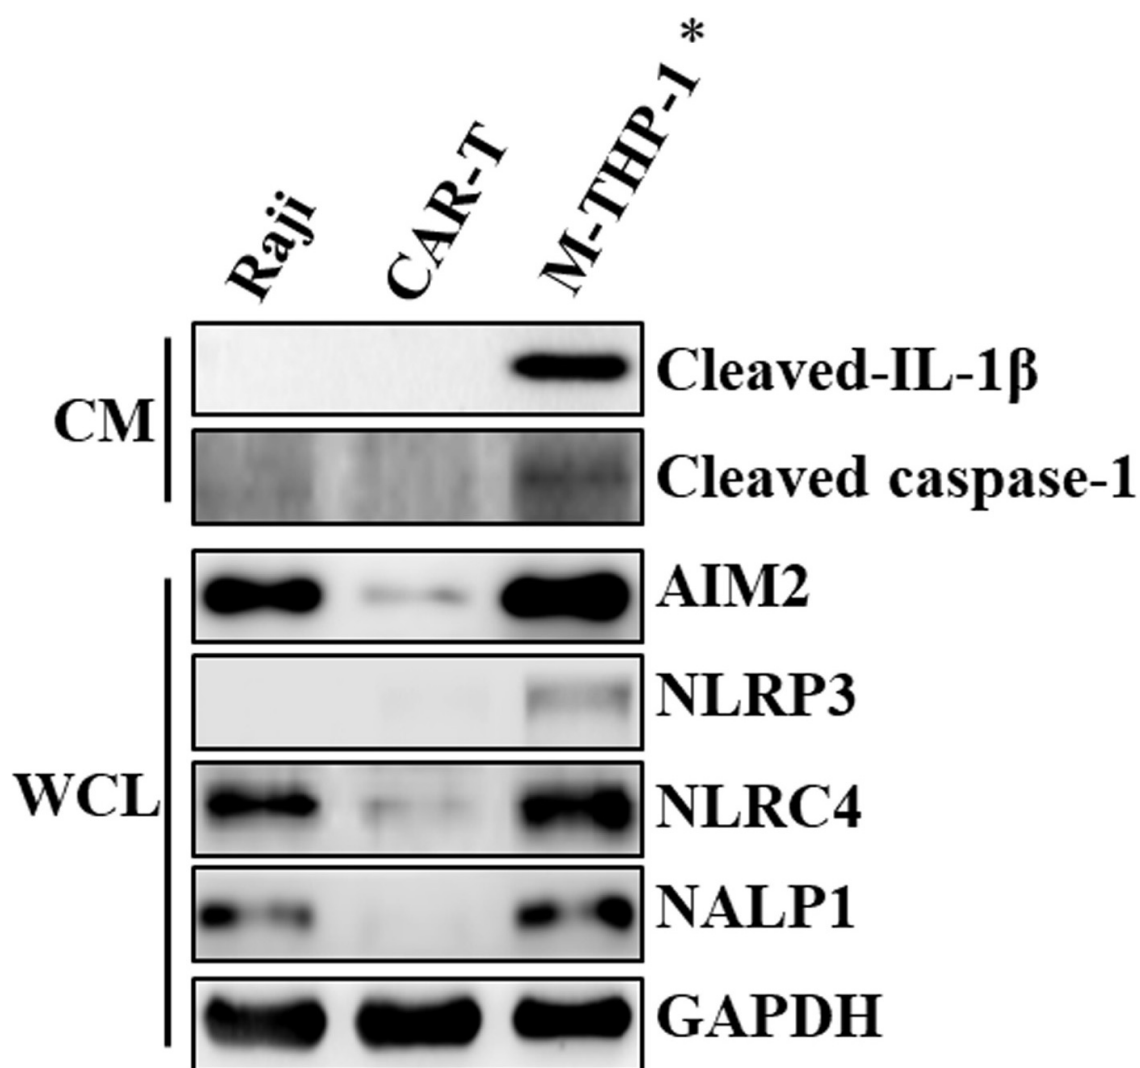

Supplement: jitc-2020-001466supp003.pdf [file jitc-2020-001466supp003.pdf]

## Supplementary Figure 3

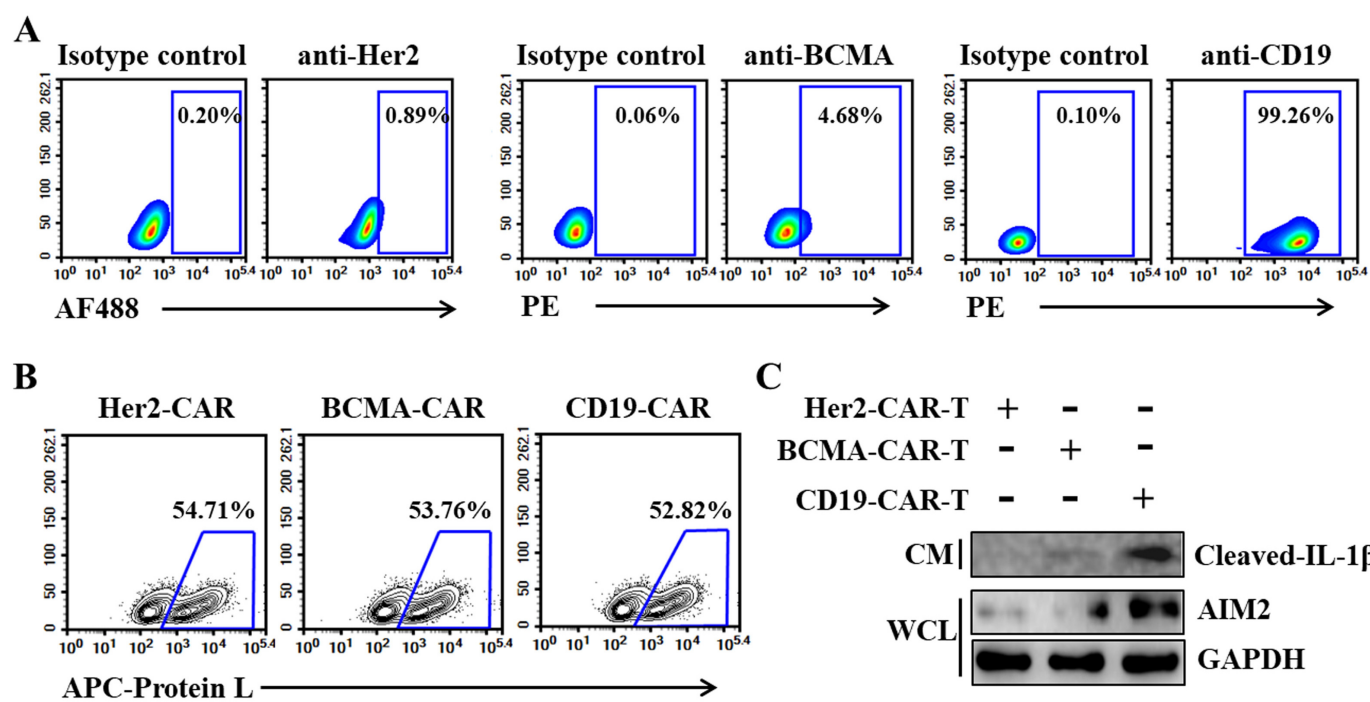

Supplement: jitc-2020-001466supp004.pdf [file jitc-2020-001466supp004.pdf]

## Supplementary Figure 4

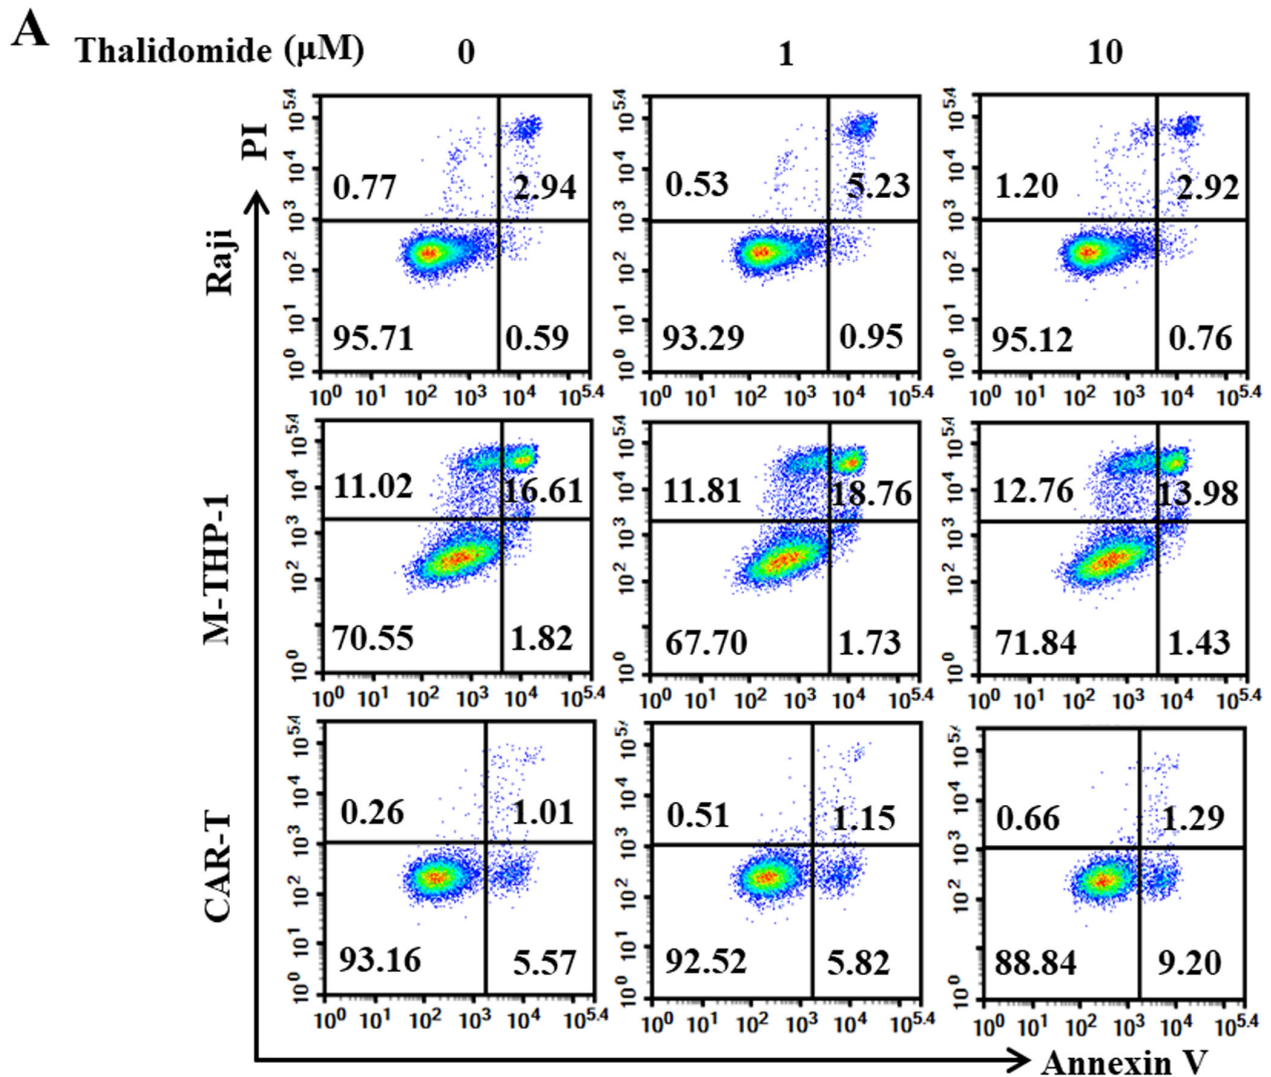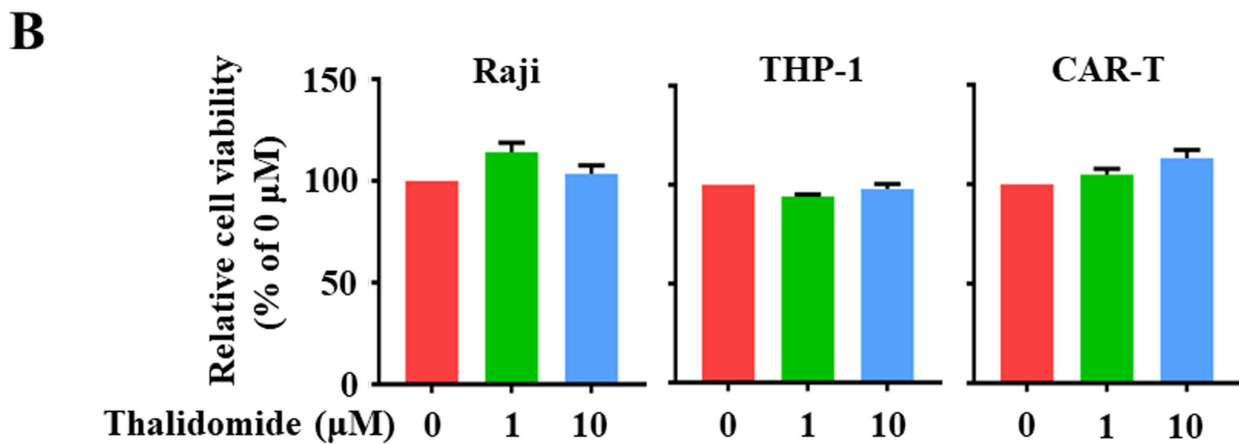

Supplement: jitc-2020-001466supp005.pdf [file jitc-2020-001466supp005.pdf]

## Supplementary Figure 6

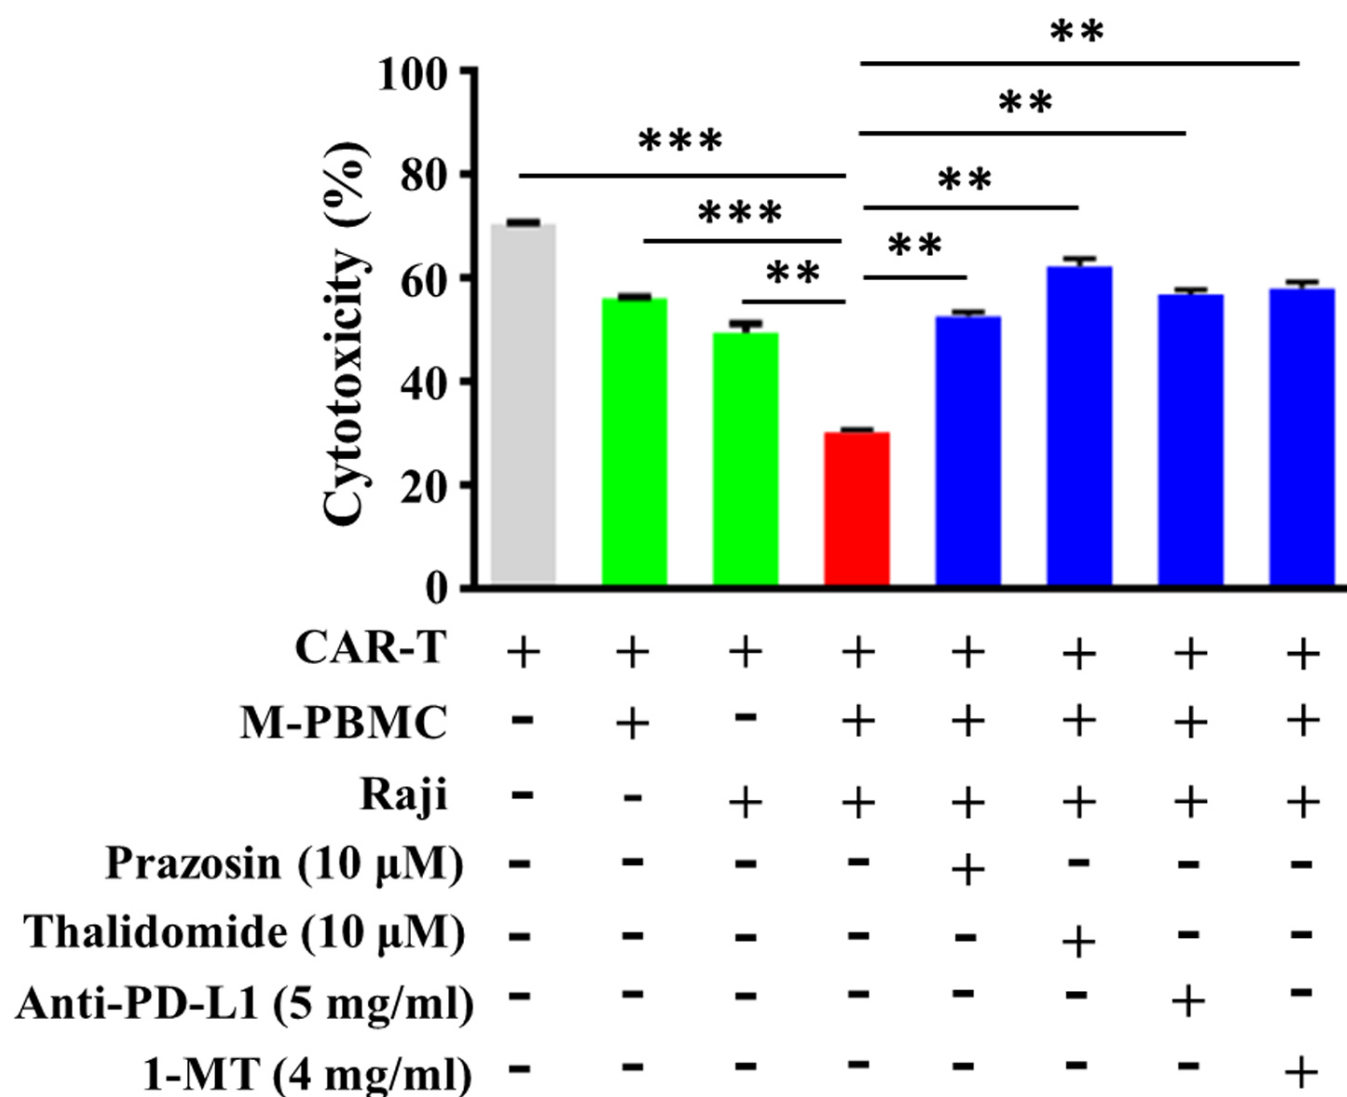

Supplement: jitc-2020-001466supp007.pdf [file jitc-2020-001466supp007.pdf]
